# Supplementary material
Source: PubMed Central journal article supplement (PMC3561824)
Supplement: JCI64768sd.pdf [file JCI64768sd.pdf]

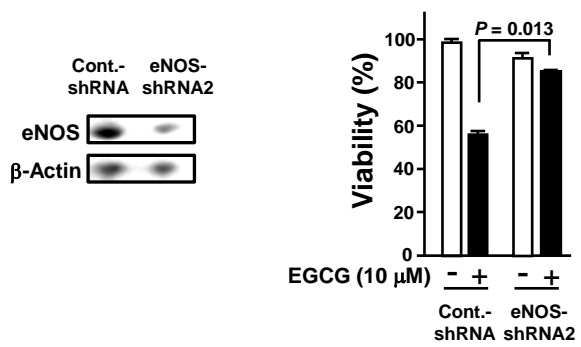

### Supplemental Figure 1

**eNOS is a critical mediator of EGCG-induced cell death.**

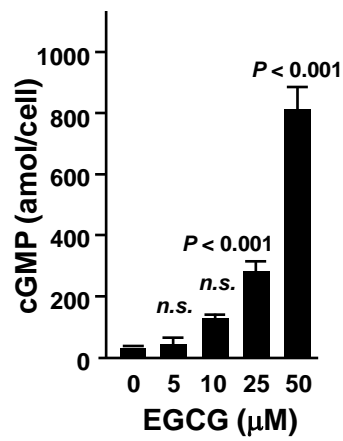

## Supplemental Figure 2

EGCG induces cGMP production in the human MM cell line U266 in a dose-dependent manner.

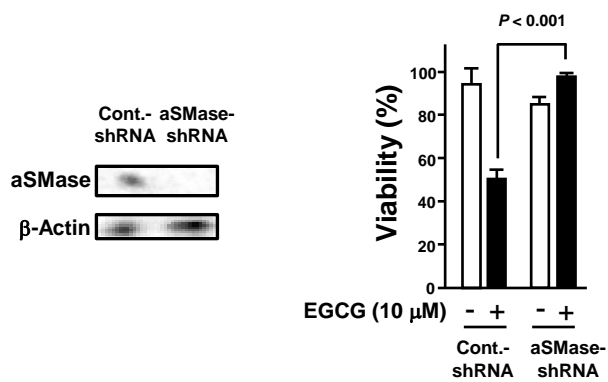

### Supplemental Figure 3

ASMase is a critical mediator of EGCG-induced cell death of U266 cells.

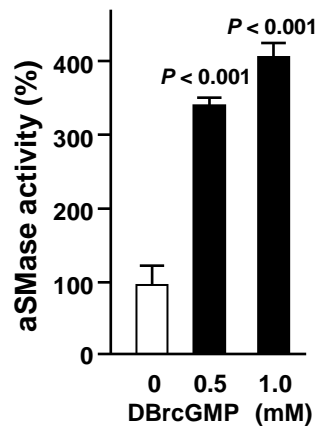

**Supplemental Figure 4**

**The cell-permeable cGMP analog dibutyryl-cGMP induces aSMase activation.**

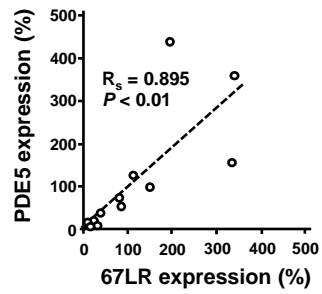

## Supplemental Figure 5

The correlation between the expressions of the 67LR and PDE5 in primary MM cells and normal PBMCs.

## Multiple Myeloma

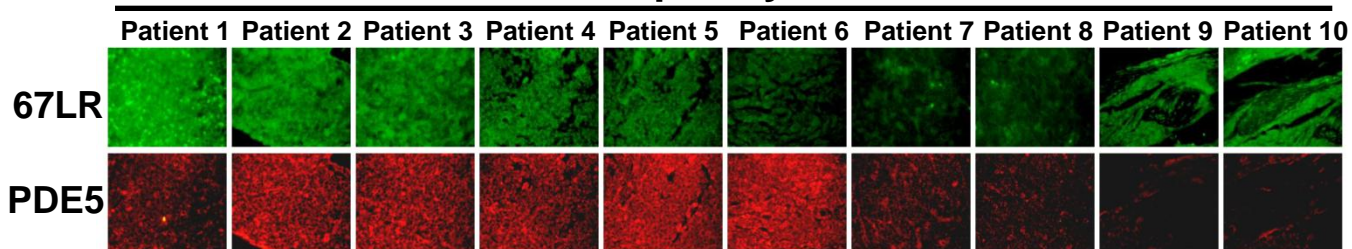

## Normal bone marrow tissue

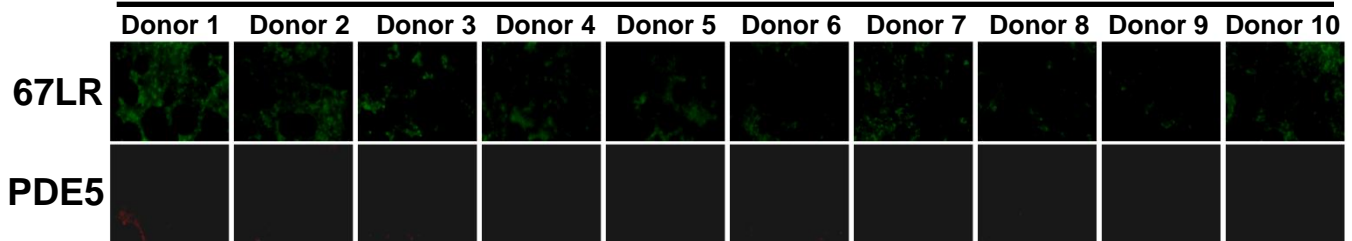

Supplemental Figure 6

The expressions of 67LR and PDE5 in MM and normal bone marrow tissue.

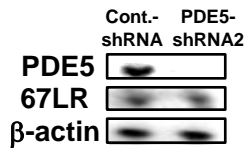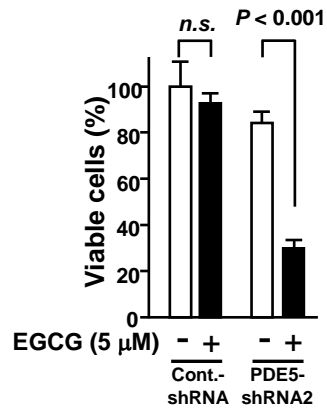

**Supplemental Figure 7**

**Effect of PDE5 knock-down on the expression level of 67LR and the EGCG sensitivity.**

**A**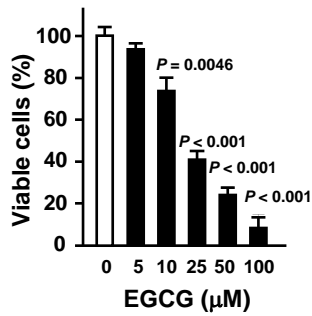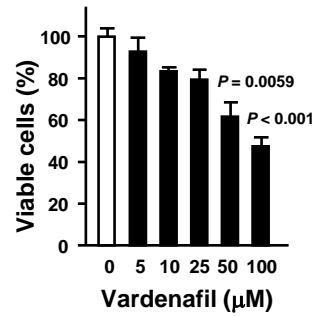**B**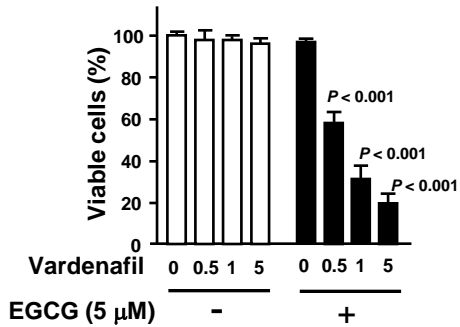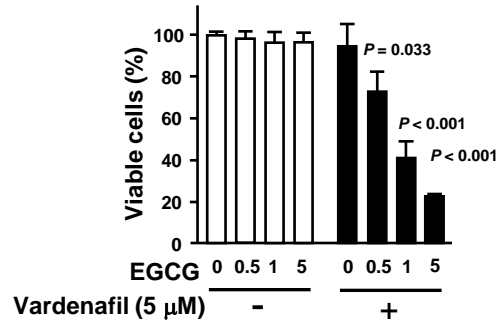**C**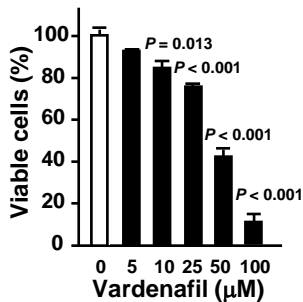**D**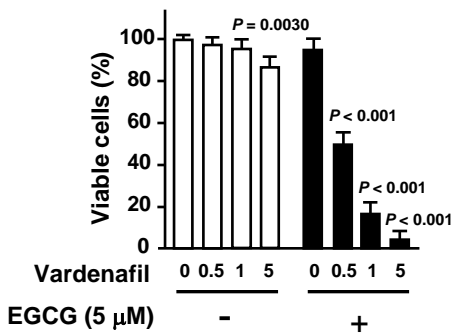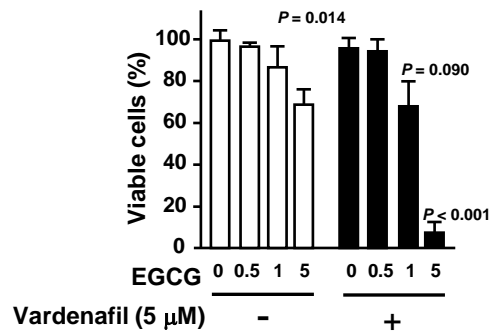**Supplemental Figure 8**

An EGCG/PDE5 inhibitor in combination inhibits the growth of U266 cells and RPMI8226 cells.



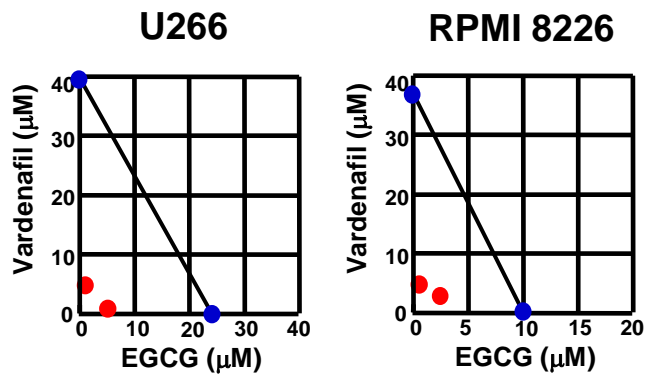

Supplemental Figure 9

Isobologram analysis for EGCG combined with vardenafil in MM cell lines.

**A**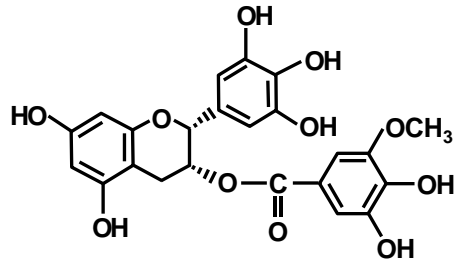

**(-)-epigallocatechin-3-O-(3-O-methyl) gallate  
(EGCG3''Me)**

**B**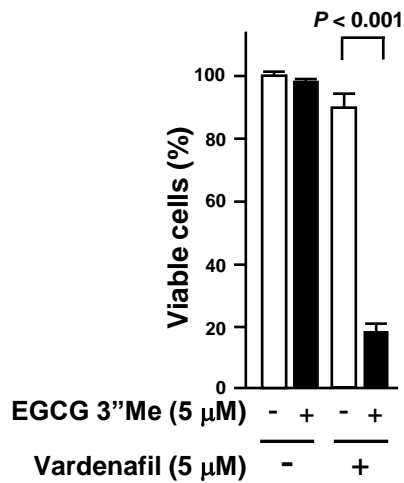

Supplemental Figure 10

EGCG 3''Me/vardenafil in combination induces cell death in U266 cells.

**A**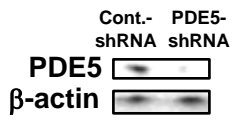**B**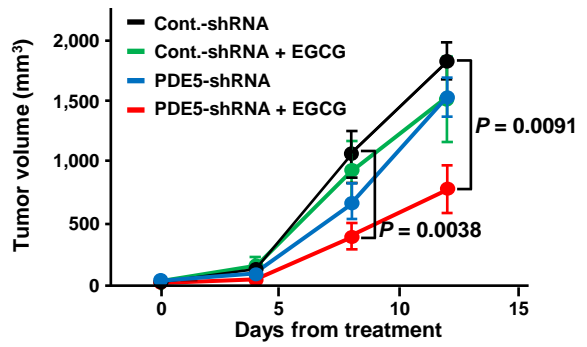**C**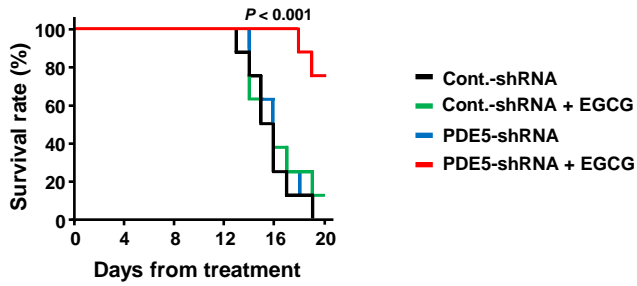**Supplemental Figure 11****Effect of PDE5 knock-down on the EGCG sensitivity in vivo.**

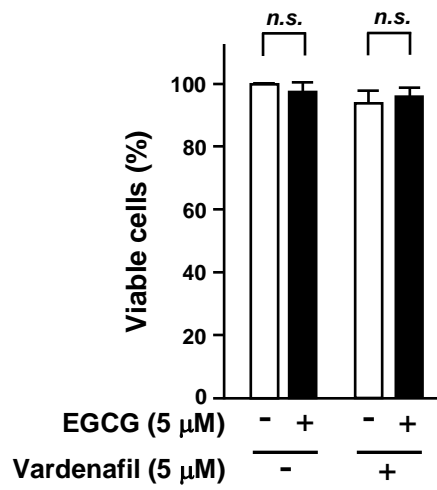

Supplemental Figure 12

Effect of EGCG/vardenafil in combination on the proliferation of HUVECs.

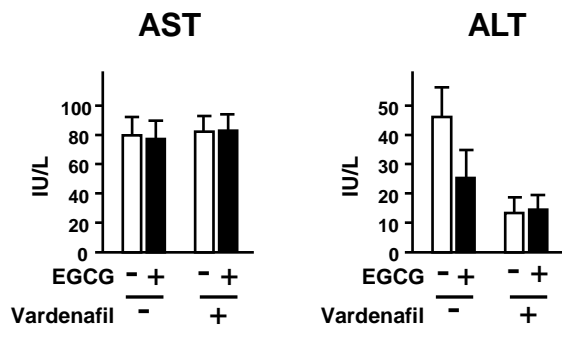

Supplemental Figure 13

Effect of EGCG/vardenafil in combination on the serum levels of AST and ALT.
